# Supplementary material
Source: ML conference proceedings conference paper supplement (https://openaccess.thecvf.com/content/CVPR2021/html/Sun_Deep_Video_Matting_CVPR_2021_paper.html)
Supplement: Supplementary file 1 [file Sun_Deep_Video_Matting_CVPR_2021_supplemental.zip]

Archive with 3 entries (2 files):
- 01866-supp/
- 01866-supp/supplementary_material.pdf
- 01866-supp/demo.mp4
